# Supplementary material for: Four and a Half LIM Domains Protein 2 Mediates Bortezomib-Induced Osteogenic Differentiation of Mesenchymal Stem Cells in Multiple Myeloma Through p53 Signaling and β-Catenin Nuclear Enrichment
Source: PubMed Central journal article supplement (PMC8473907; doi:10.3389/fonc.2021.729799), 2021-09-13

A

PC

MSC

p53 deletion  
patient 1

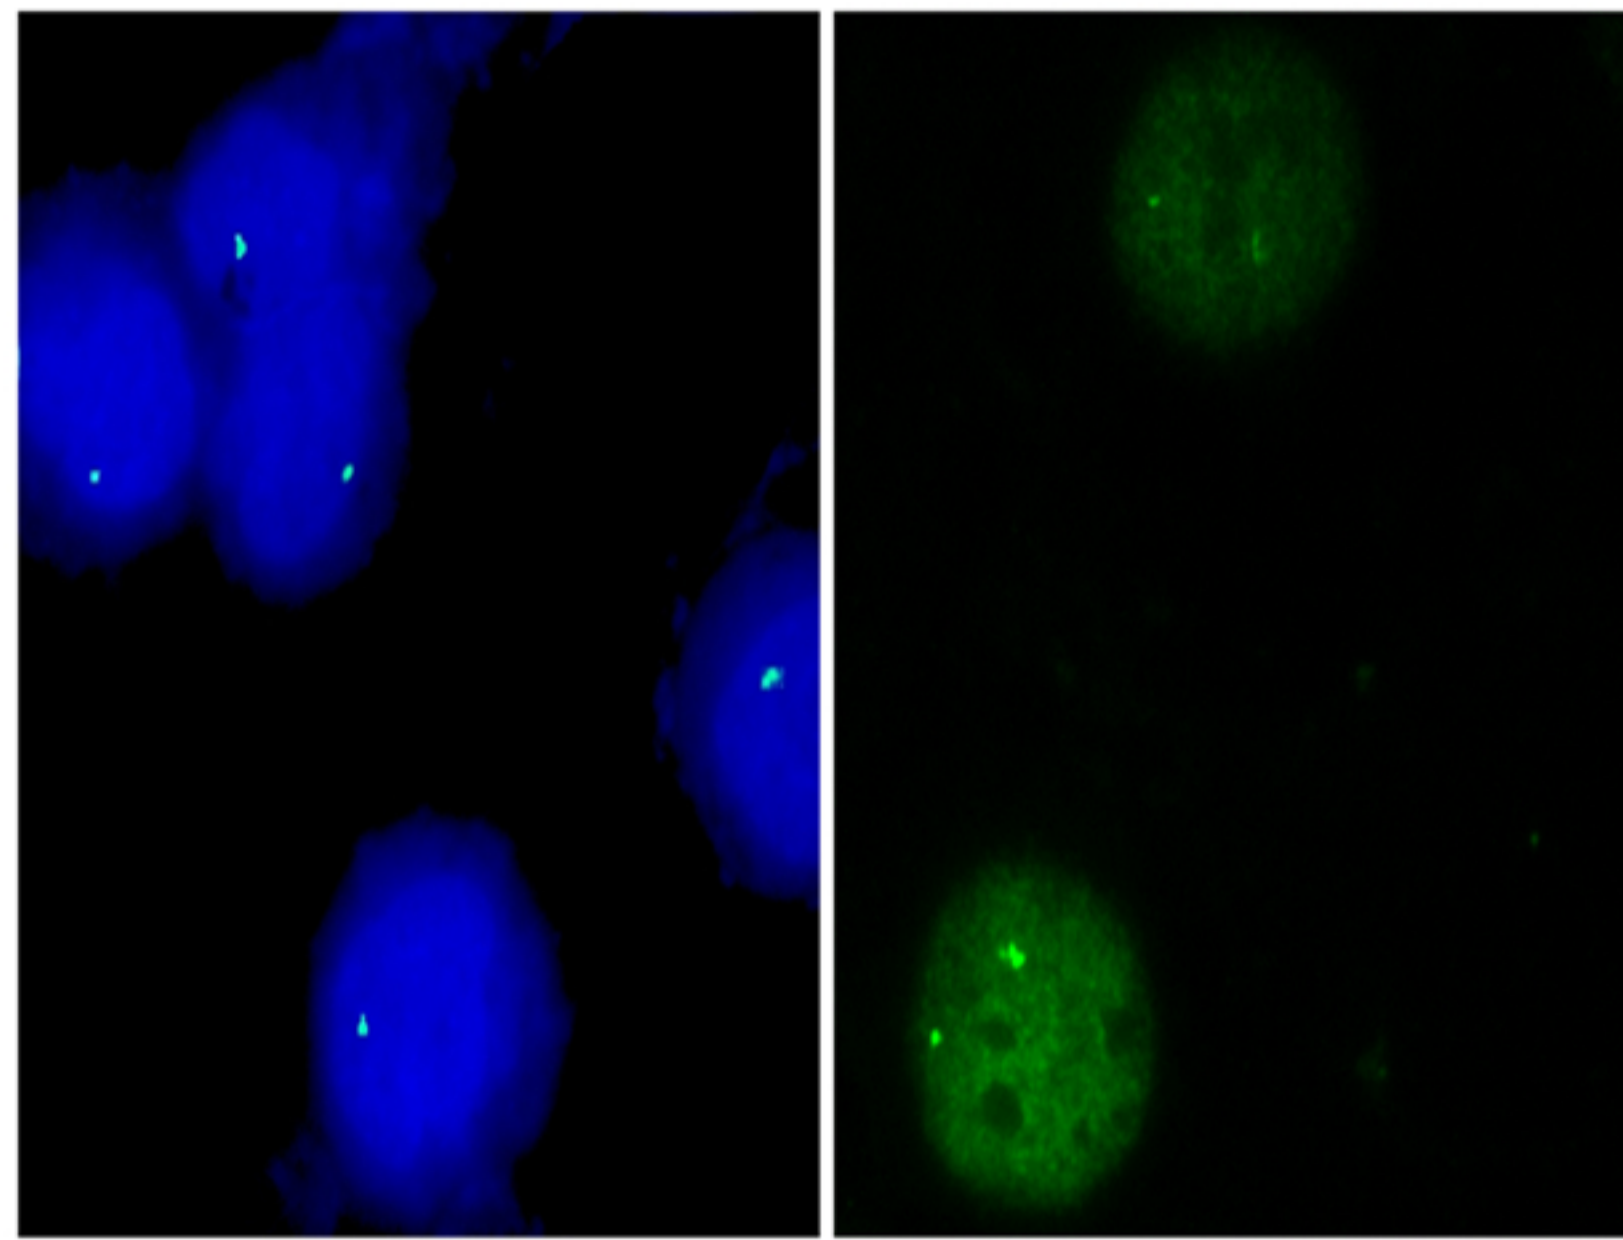

q21 amplicaiton  
patient 5

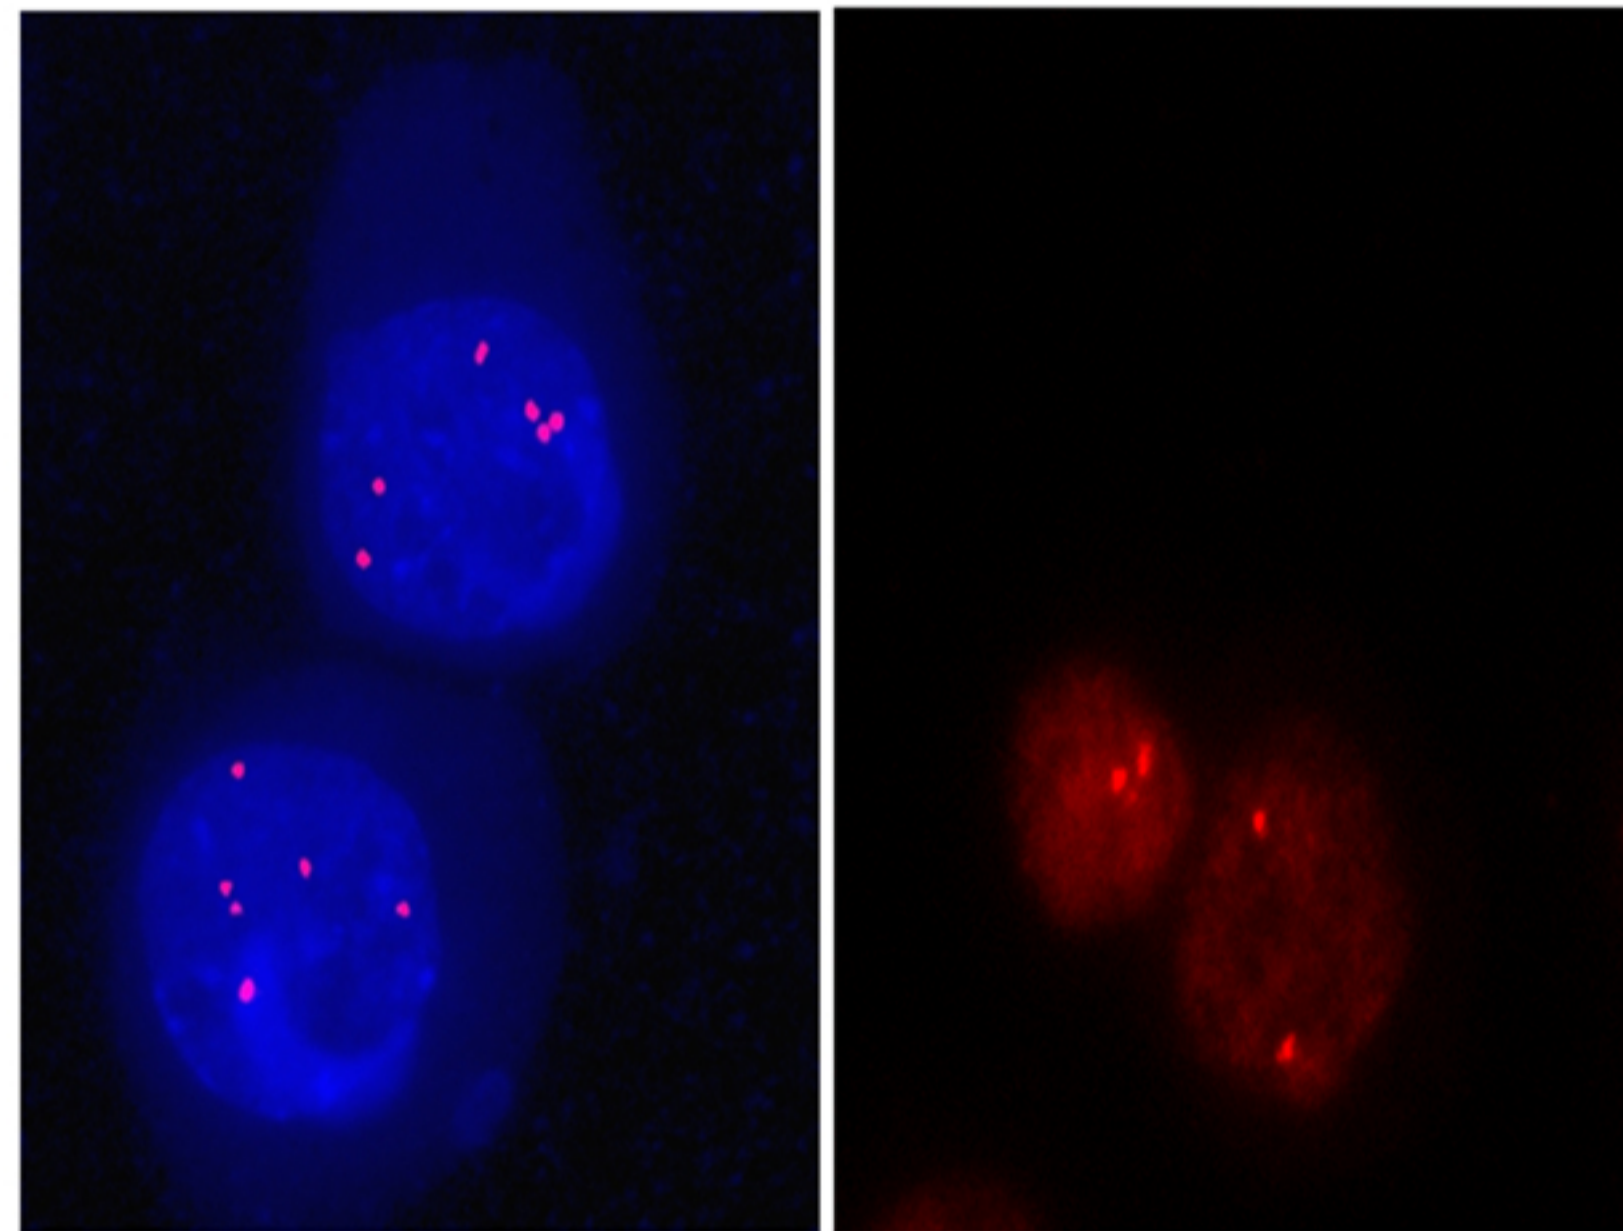

RB deletion  
patient 3

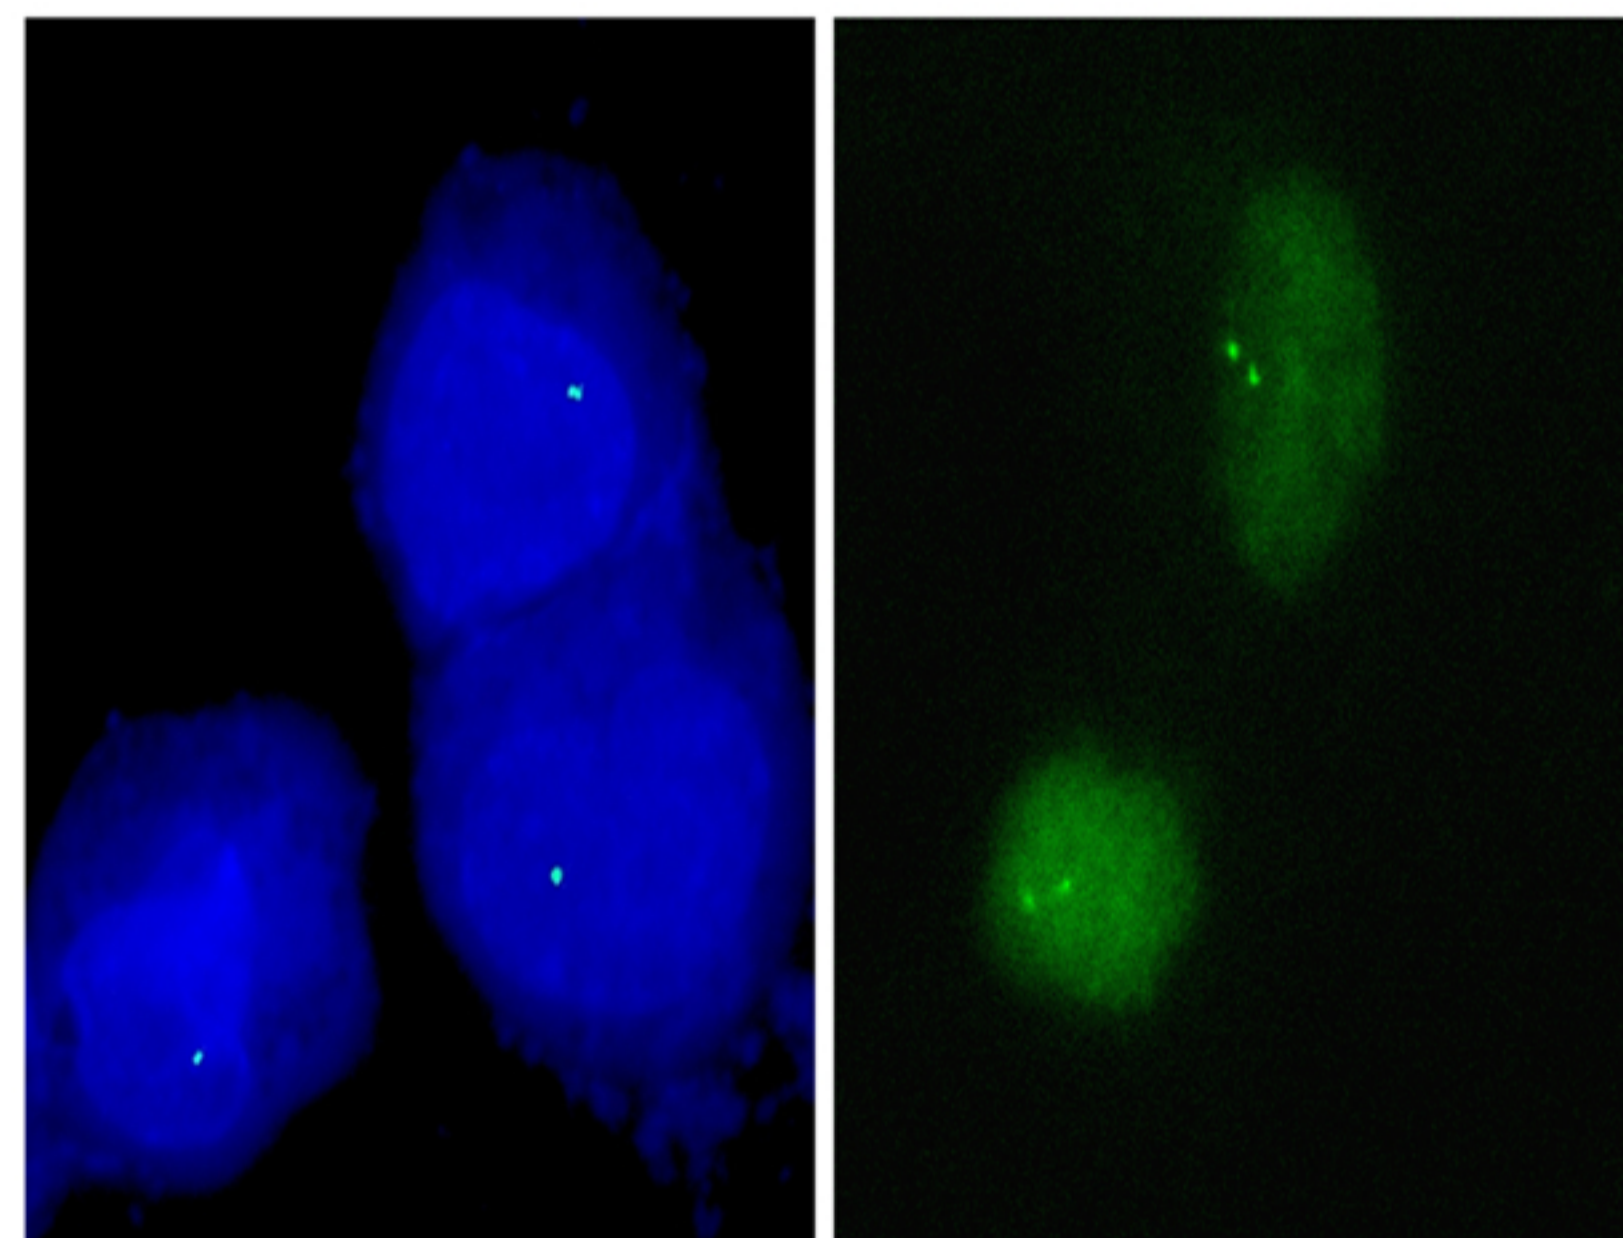

IGHC/IGHV  
patient 4

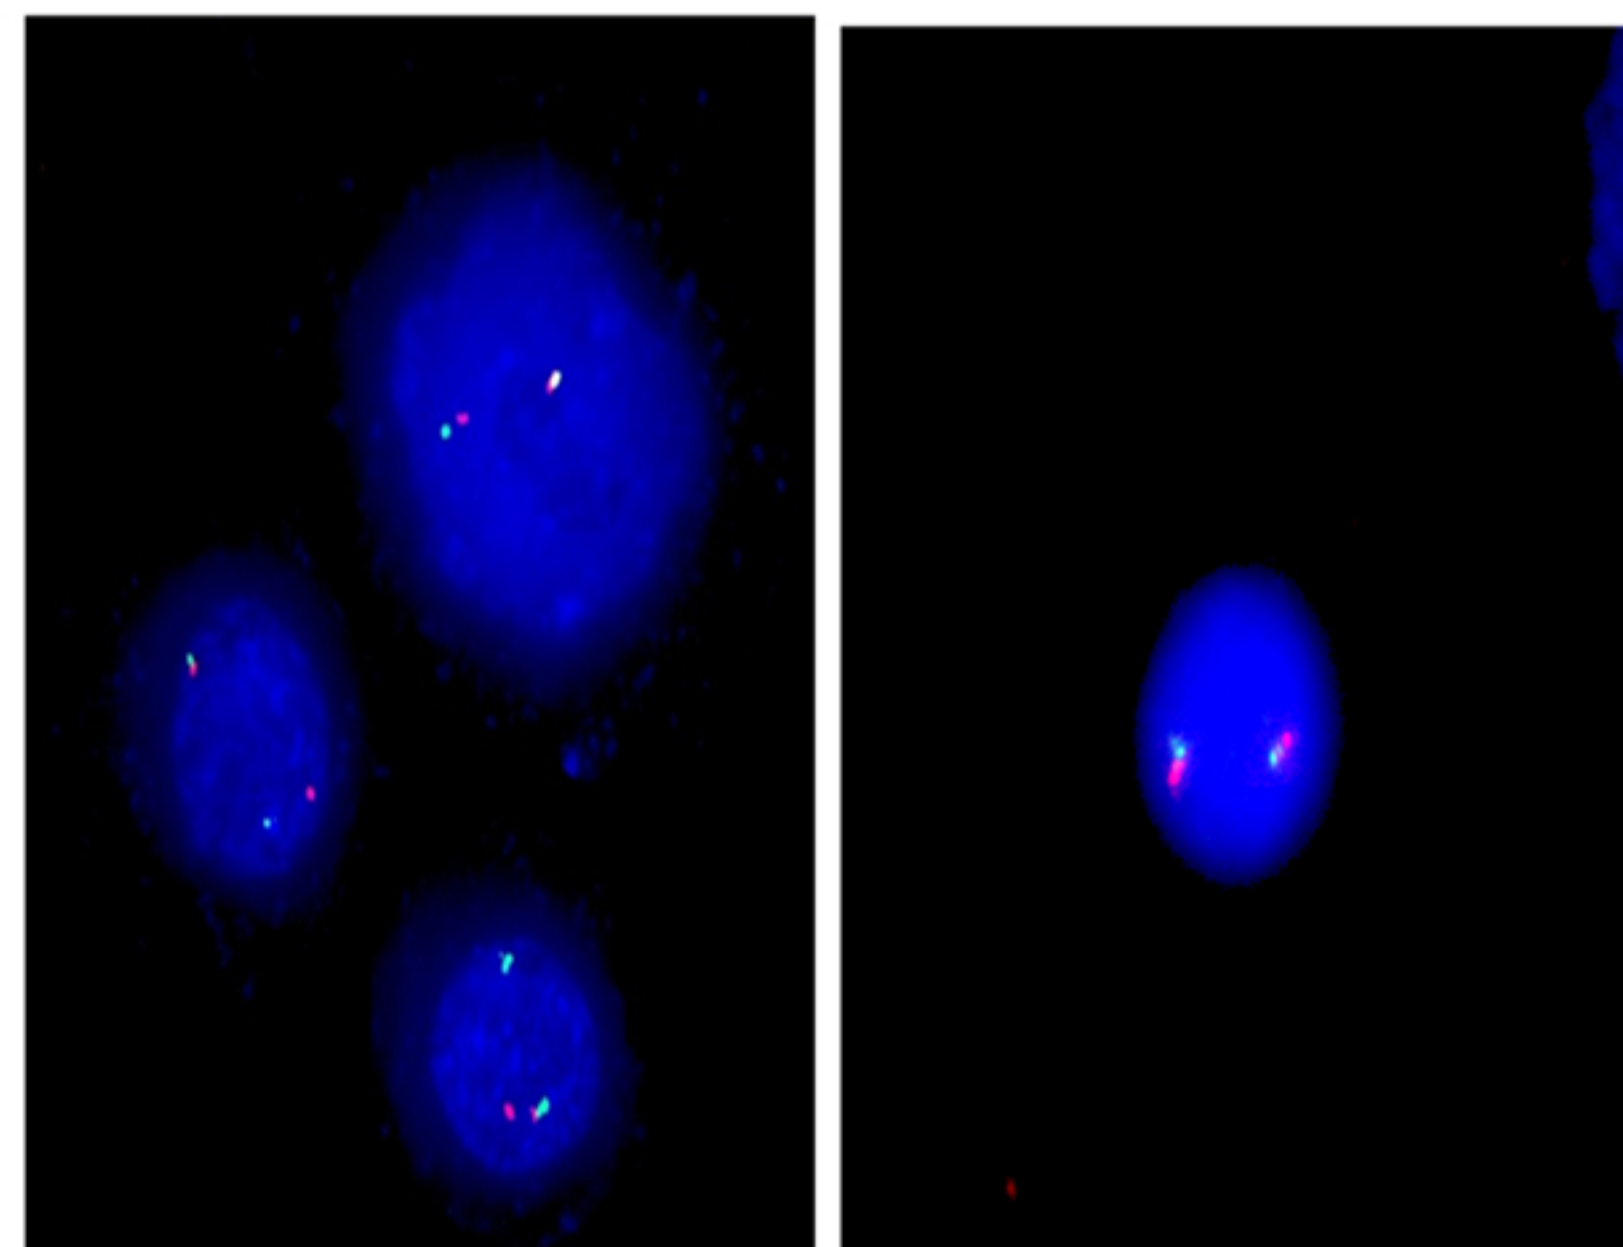

Supplement: DataSheet_2.pdf [file DataSheet_2.pdf]
