# Supplementary material for: Four and a Half LIM Domains Protein 2 Mediates Bortezomib-Induced Osteogenic Differentiation of Mesenchymal Stem Cells in Multiple Myeloma Through p53 Signaling and β-Catenin Nuclear Enrichment
Source: PubMed Central journal article supplement (PMC8473907; doi:10.3389/fonc.2021.729799), 2021-09-13
Supplement: DataSheet_3.pdf [file DataSheet_3.pdf]

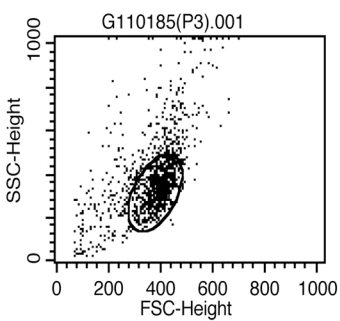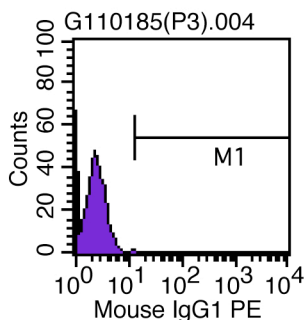

| Marker | % Gated |
|--------|---------|
| All    | 100.00  |
| M1     | 0.00    |

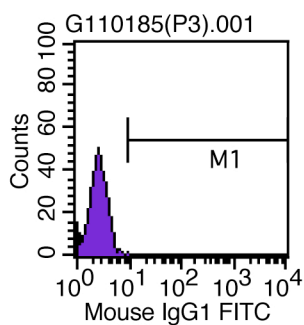

| Marker | % Gated |
|--------|---------|
| All    | 100.00  |
| M1     | 0.00    |

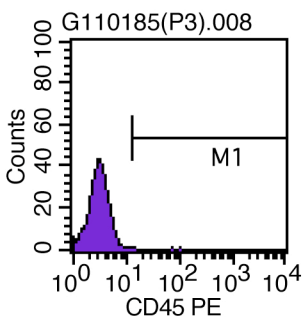

| Marker | % Gated |
|--------|---------|
| All    | 100.00  |
| M1     | 0.13    |

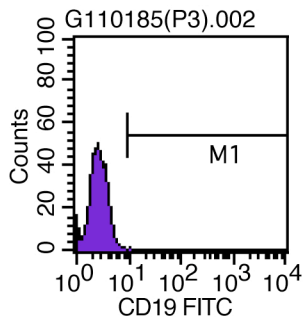

| Marker | % Gated |
|--------|---------|
| All    | 100.00  |
| M1     | 0.03    |

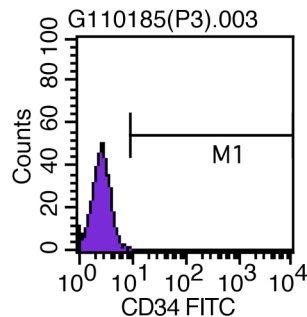

| Marker | % Gated |
|--------|---------|
| All    | 100.00  |
| M1     | 0.00    |

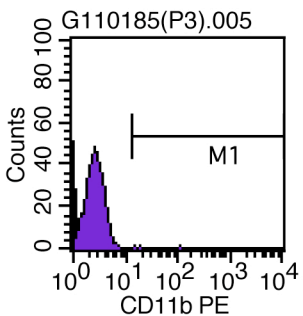

| Marker | % Gated |
|--------|---------|
| All    | 100.00  |
| M1     | 0.09    |

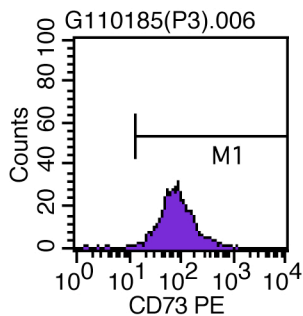

| Marker | % Gated |
|--------|---------|
| All    | 100.00  |
| M1     | 99.69   |

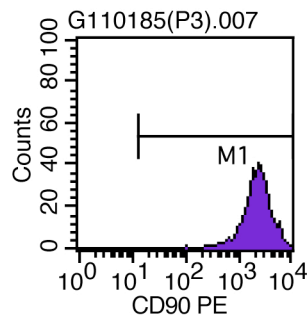

| Marker | % Gated |
|--------|---------|
| All    | 100.00  |
| M1     | 100.00  |

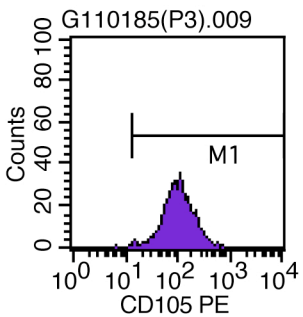

| Marker | % Gated |
|--------|---------|
| All    | 100.00  |
| M1     | 99.88   |

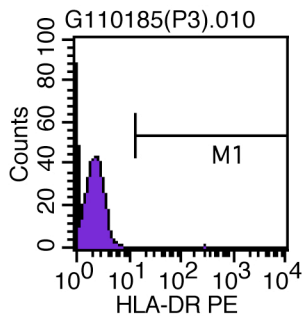

| Marker | % Gated |
|--------|---------|
| All    | 100.00  |
| M1     | 0.03    |

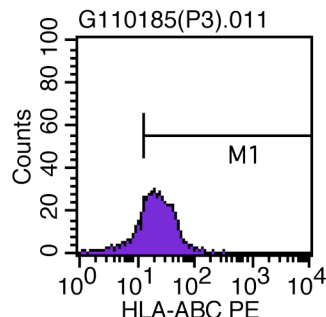

| Marker | % Gated |
|--------|---------|
| All    | 100.00  |
| M1     | 82.23   |
