# Supplementary material for: Four and a Half LIM Domains Protein 2 Mediates Bortezomib-Induced Osteogenic Differentiation of Mesenchymal Stem Cells in Multiple Myeloma Through p53 Signaling and β-Catenin Nuclear Enrichment
Source: PubMed Central journal article supplement (PMC8473907; doi:10.3389/fonc.2021.729799), 2021-09-13
Supplement: DataSheet_4.pdf [file DataSheet_4.pdf]

**Supplemental table 1.** Genetic aberrations found in paired MSCs and PCs of MM patients.

| <b>Patients ID number</b> | <b>Cell type</b> | <b>p53 deletion</b> | <b>1q21 amplification</b> | <b>RB-1 deletion</b> | <b>D13S319 deletion</b> | <b>IGH translocation</b> |
|---------------------------|------------------|---------------------|---------------------------|----------------------|-------------------------|--------------------------|
| <b>1</b>                  | MSC              | -                   | -                         | -                    | -                       | -                        |
|                           | PC               | -                   | +                         | -                    | -                       | -                        |
| <b>2</b>                  | MSC              | -                   | -                         | -                    | -                       | -                        |
|                           | PC               | -                   | -                         | +                    | +                       | -                        |
| <b>3</b>                  | MSC              | -                   | -                         | -                    | -                       | -                        |
|                           | PC               | -                   | -                         | +                    | +                       | -                        |
| <b>4</b>                  | MSC              | -                   | -                         | -                    | -                       | -                        |
|                           | PC               | -                   | -                         | -                    | -                       | +                        |
| <b>5</b>                  | MSC              | -                   | -                         | -                    | -                       | -                        |
|                           | PC               | -                   | +                         | -                    | -                       | -                        |
| <b>6</b>                  | MSC              | -                   | -                         | -                    | -                       | -                        |
|                           | PC               | +                   | -                         | -                    | -                       | -                        |

PC, plasma cells; MSC, mesenchymal stem cell; IGH, immunoglobulin heavy chain. Interphase fluorescence in situ hybridization (FISH) analysis was performed.

---

**Supplementary Figure 1. The detailed characteristics of MM-MSCs.** As measured by flow cytometry, all the MM-MSCs expressed CD73, CD90 and CD105 (95%). In addition, these cells lacked expression of CD14, CD19, CD34, CD45 and HLA-DR ( $\leq 2\%$ ).

**Supplementary Figure 2. Adipocytes differentiation of MM-MSCs in vitro.** Oil Red O staining was performed to demonstrate the adipocytes differentiation of MM-MSCs.

**Supplementary Figure 3. Genetic aberrations detected by FISH in paired MSCs and PCs of MM patients.** Interphase fluorescence in situ hybridization (FISH) analysis was performed in MM-MSCs and its paired CD138<sup>+</sup> plasma cells from MM patients.
